# Supplementary material for: Merits of novel high-resolution estimates and existing long-term estimates of humidity and incident radiation in a complex domain
Source: Copernicus journal article supplement (doi:10.5194/essd-11-797-2019), 2019-06-12
Supplement: Supplementary file 1 [file essd-11-797-2019-supplement.pdf]

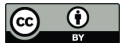

## *Supplement of*

# **Merits of novel high-resolution estimates and existing long-term estimates of humidity and incident radiation in a complex domain**

**Helene Birkelund Erlandsen et al.**

*Correspondence to:* Helene Birkelund Erlandsen (hebe@nve.no)

The copyright of individual parts of the supplement might differ from the CC BY 4.0 License.

## 1 Procedure to calculate the HySN data set

Era Interim daily mean 2 meter dew point temperature ( $T2d_E$ ), 2 meter temperature ( $T2_E$ ), surface pressure ( $ps_E$ ) are taken as the arithmetic mean of the Era-Interim analysis fields, available every 6 hours. Surface incident longwave ( $LW_E$ ) and shortwave ( $LW_E$ ) radiation are taken from +12, +18, and +24 hours of the Era-Interim forecasts at 00 and 12 UTC, to reduce the influence spin-up effects have on the fields (see e.g. Weedon et al., 2014; Balsamo et al., 2015). The high resolution gridded observational dataset used in the compilation is the daily SeNorge v2.1 2-meter temperature ( $T2_{SN}$ ) (Lussana et al., 2018).

The Era-interim data is interpolated to the SeNorge grid in three stages, using bilinear interpolation in most areas, but nearest-neighbour interpolation for SeNorge land areas close to the Era-Interim landmask, and bilinear interpolation for SeNorge land areas outside Era-Interims landmask.

### 1.1 Vapour pressure [VP] and surface pressure [ps]

The method for downscaling near surface humidity follows Cosgrove (2003), where relative humidity (RH) is assumed constant with height. The assumption of constant relative humidity with elevation is explored in e.g. Feld et al. (2013), and is used in the making of NLDAS, WFD, and PGMFD. RH is given by the ratio of the ambient vapour pressure [VP] (the vapour pressure at dew point [ $T_d$ ] or frost point [ $T_f$ ] temperature) divided by the saturation vapour pressure [ $VP_s$ ] of moist air at the actual air temperature, multiplied by 100:

$$RH = \frac{VP \cdot 100}{VP_s} \quad (S1)$$

The Era-Interim 2-meter RH ( $RH_E$ ) is calculated using the Era-Interim surface pressure ( $ps_E$ ),  $T2_E$ , and  $T2d_E$ , and Equation ew1 in Buck (1981) [Buck81]. The resulting, vertically adjusted HySN dew point or freeze point temperature (for simplicity, denoted  $T2d_H$ ) is computed (in Celsius) directly from  $RH_E$  (see e.g. Feld et al. (2013)) using the Buck81 equation for water and the AERKi equation in Alduchov and Eskridge (1996) for ice:

$$T2d_H = \frac{c \cdot [\ln(RH_E/100) + b(T2_{SN})/(c + T2_{SN})]}{b - \ln(RH_E/100) - b(T2_{SN})/(c + T2_{SN})}. \quad (S2)$$

For water  $b$  is 17.502 and  $c$  is 240.97. For ice  $b$  is 22.587 and  $c$  is 273.86.

The vapour pressure is then calculated (still using the Buck81 for water and AERKi for ice,) with suggested pressure dependent enhancement factors ( $f_e$ ) from Alduchov and Eskridge (1996). The HySN surface pressure ( $ps_H$ ) is estimated by vertically adjusting the Era-Interim surface pressure to SeNorge orography combining the hydrostatic ap-

proximation and the ideal gas law equation (Eq. 6 in Cosgrove (2003), similar to the hypsometric equation):

$$ps_H = \frac{ps_E}{e^{(g\Delta z)/(RT2_m)}}, \quad (S3)$$

where  $T2_m = \frac{T2_{SN} + T2_E}{2}$  is the estimated mean temperature (in Kelvin) in the atmospheric column between the SeNorge grid elevation and the ERA-Interim grid elevation.  $\Delta z$  is the difference in elevation between the SeNorge grid and the ERA-Interim grid. Finally the adjusted vapour pressure is calculated:

$$f_e = d \cdot e^{g \cdot ps_H / 100}. \quad (S4)$$

$$VP_H = f_e \cdot a \cdot e^{b \cdot T_{dH} / (c + T_{dH})} \quad (S5)$$

For water  $d$  is 1.00071 and  $g$  is 0.0000045, while for ice  $d$  is 0.99882 and  $g$  is 0.000008 (Alduchov and Eskridge, 1996).  $b$  is 17.502 and  $c$  is 240.97 for water [Buck81]. For ice  $b$  is 22.587 and  $c$  is 273.86 [AERKi]. If supersaturation occurs vapour pressure is calculated for saturation, limiting RH to 100%.

### 1.2 Longwave incident radiation [LW]

The longwave radiation is adjusted (following Eq. 14 in Cosgrove (2003)) by scaling  $LW_E$  with the ratio of the estimated Stefan-Boltzmann grey body radiation in the SeNorge grid to the estimated Era-Interim Stefan-Boltzmann grey body radiation.

$$LW_H = \frac{\varepsilon_H \sigma_{sb}}{\varepsilon_E \sigma_{sb}} \left( \frac{T2_{SN}}{T2_E} \right)^4 LW_E. \quad (S6)$$

$\sigma_{sb}$  is the Stephen-Boltzmann constant,  $\varepsilon_E$  is the Satterlund (1979) estimate of clear sky emissivity given the Era-Interim humidity and temperature:  $\varepsilon_E = 1.08(1 - e(-VP_E^{T2_E/2016}))$ , and  $\varepsilon_H$  is similarly the Satterlund (1979) estimate of clear sky emissivity given the SeNorge temperature and HySN humidity:  $\varepsilon_H = 1.08(1 - e(-VP_H^{T2_{SN}/2016}))$ .

### 1.3 Shortwave incident radiation [SW]

No consistent approach is used in other forcing datasets for adjusting SW radiation. Given that SW is very sensitive to near surface humidity, and that the Cosgrove (2003) method used above adjusts VP, we choose to scale the Era-Interim SW based on the estimated clear sky transmissivity for the two datasets; i.e. a method similar to that used to derive the adjusted LW is used. In Thornton and Running (1999) [TR99] different empirical estimates of the total daily clear sky transmissivity of SW are found, given different input data. Method (z, e) in Table 2 in TR99 predicts the daily clear sky transmissivity based on altitude (z) and VP (denoted with e in TR99):

$$\tau_{CC} = \tau_0^{p_s(z)/p_{s0}} + \alpha V P$$

$\tau_0$  is 0.72 and is an empirical expression of the instantaneous transmittance for a dry atmosphere at reference pressure,  $p_s(z)$  is the surface air pressure at grid elevation and  $p_{s0}$  is the reference surface pressure (e.g. 101300 Pa; it is cancelled out in the calculations).  $\alpha$  is  $-1.5 \cdot 10^{-5} \text{Pa}^{-1}$  and is a slope parameter relating the influence of water vapour on the transmissivity. The adjusted SW is then calculated by scaling the Era-Interim SW with the ratio of the empirical expression of clear sky SW transmissivity given the difference in grid elevation and VP in the SeNorge and the Era-Interim grid. Since the expression for SW in TR99 is a multiplicative expression of extra-terrestrial (astronomical) radiation scaled by both an all-sky and clear-sky transmissivity, the ratio of the clear-sky transmissivity is squared.

$$SW_H = \left( \frac{\tau_0^{p_{sH}(z)/p_{s0}} + \alpha V P_H}{\tau_0^{p_{sE}(z)/p_{s0}} + \alpha V P_E} \right)^2 SW_E. \quad (S7)$$

The HySN data product is freely available from Zenodo (<https://doi.org/10.5281/zenodo.1970170>), and the Python code to generate the data is available on GitHub (<https://doi.org/10.5281/zenodo.1435555>).

## 2 Vertical gradients in vapour pressure

Both the observations and model estimates were analysed for dependence on geographical predictors. In order to derive the coefficients to adjust the model estimates to the station observations linear regression was used on seasonal mean values at the location of the 84 measurement stations (see Table S1 and S2). For brevity the vertical gradients of the annual mean humidity values is show in in Fig. S2. Fig S3 shows the vertical gradient when also latitude (above  $57^\circ \text{N}$ ) is included in the regression models, while Fig. S4 shows the vertical gradient when altitude, latitude (above  $57^\circ \text{N}$ ), distance to the coast, with interaction allowed between the altitude and distance to the coast. Altitude is a significant predictor of vapour pressure in the observations and models, also when additional geographical predictors are included.

## References

- Alduchov, O. A. and Eskridge, R. E.: Improved Magnus Form Approximation of Saturation Vapor Pressure, *Journal of Applied Meteorology*, 35, 601–609, doi:10.1175/1520-0450(1996)035<0601:IMFAOS>2.0.CO;2, 1996.
- Balsamo, G., Albergel, C., Beljaars, A., Boussetta, S., Brun, E., Cloke, H., Dee, D., Dutra, E., Muñoz-Sabater, J., Pappenberger, F., de Rosnay, P., Stockdale, T., and Vitart, F.: ERA-Interim/Land: a global land surface reanalysis data set, *Hydrology and Earth System Sciences*, 19, 389–407, doi:10.5194/hess-19-389-2015, 2015.

- Buck, A. L.: New Equations for Computing Vapor Pressure and Enhancement Factor, *Journal of Applied Meteorology*, 20, 1527–1532, doi:10.1175/1520-0450(1981)020<1527:NEFCVP>2.0.CO;2, 1981.
- Cosgrove, B. A.: Real-time and retrospective forcing in the North American Land Data Assimilation System (NL-DAS) project, *Journal of Geophysical Research*, 108, 8842, doi:10.1029/2002JD003118, 2003.
- Feld, S. I., Cristea, N. C., and Lundquist, J. D.: Representing atmospheric moisture content along mountain slopes: Examination using distributed sensors in the Sierra Nevada, California, *Water Resources Research*, 49, 4424–4441, doi:10.1002/wrcr.20318, 2013.
- Lussana, C., Tveito, O. E., and Uboldi, F.: Three-dimensional spatial interpolation of 2 m temperature over Norway, *Quarterly Journal of the Royal Meteorological Society*, 144, 344–364, doi:10.1002/qj.3208, 2018.
- Satterlund, D. R.: An improved equation for estimating long-wave radiation from the atmosphere, *Water Resources Research*, 15, 1649–1650, doi:10.1029/WR015i006p01649, 1979.
- Thornton, P. E. and Running, S. W.: An improved algorithm for estimating incident daily solar radiation from measurements of temperature, humidity, and precipitation, *Agricultural and Forest Meteorology*, 93, 211–228, doi:10.1016/S0168-1923(98)00126-9, 1999.
- Weedon, G. P., Balsamo, G., Bellouin, N., Gomes, S., Best, M. J., and Viterbo, P.: The WFDEI meteorological forcing data set: WATCH Forcing Data methodology applied to ERA-Interim reanalysis data, *Water Resources Research*, 50, 7505–7514, doi:10.1002/2014WR015638, 2014.

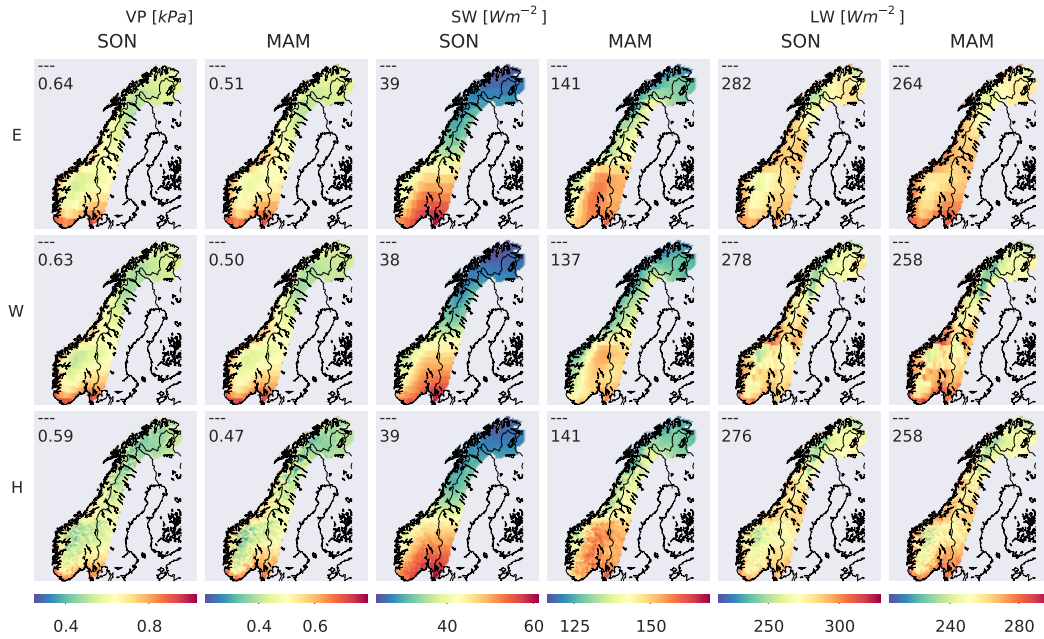

**Figure S1.** Mean (1982-2000) vapor pressure (VP), incident shortwave (SW ↓) and longwave (LW ↓) radiation estimates in fall (SON) and spring (MAM) of Era-Interim, WFDEI, and HySN. The mean value for the points which are land points for all models are denoted in the upper left corner of each image.

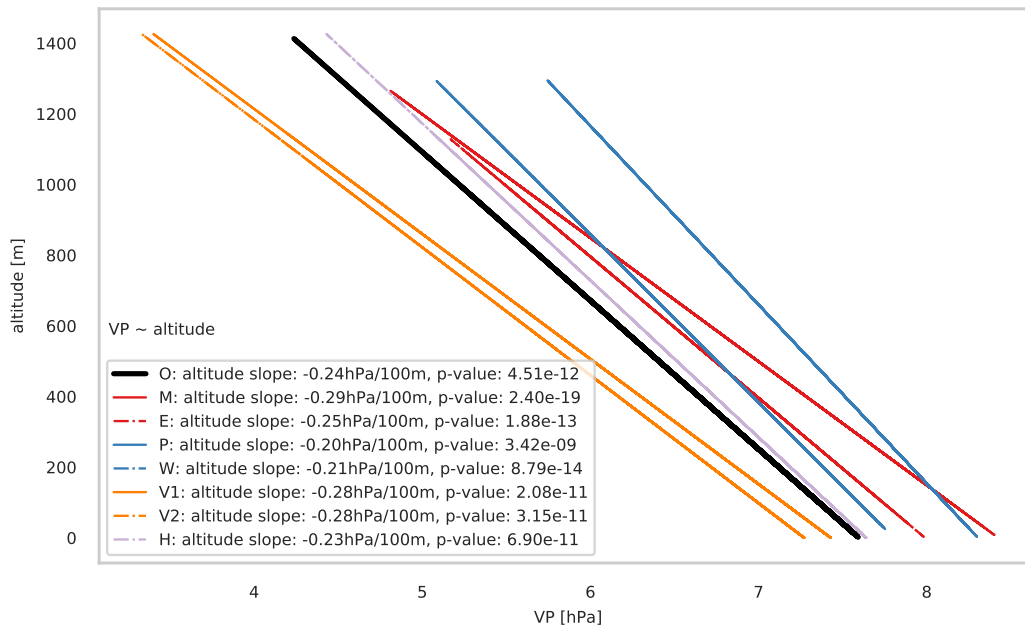

**Figure S2.** Vapour pressure as a function of altitude based on linear regression using only altitude, with annual means of vapour pressure at or near the location of the 84 measurement stations as predictand.

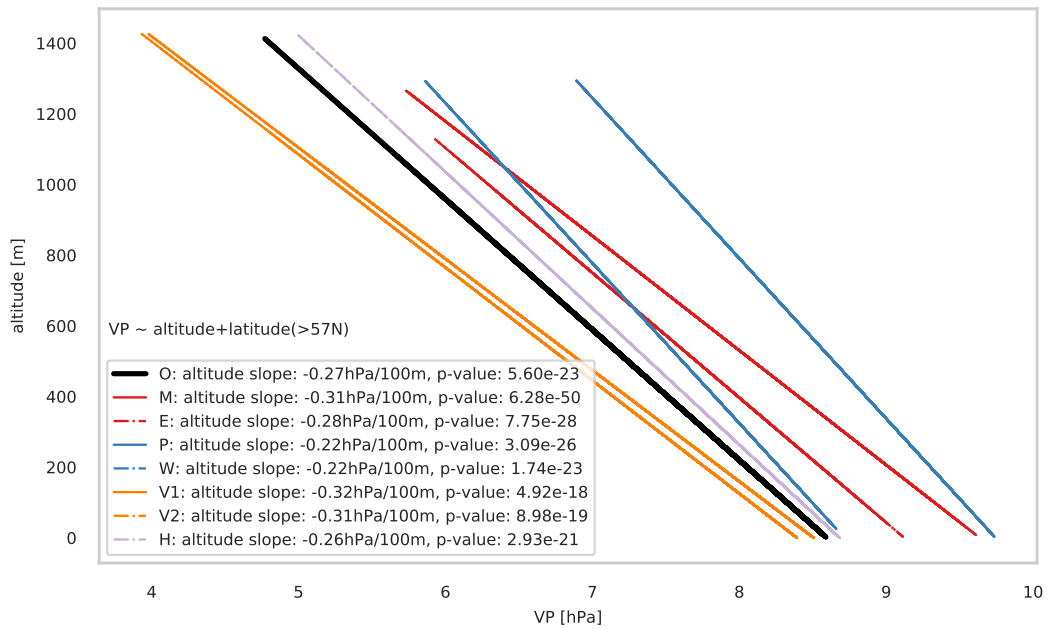

**Figure S3.** Vapour pressure as a function of altitude based on linear regression using only latitude (above 57 °N) and altitude, for mean annual values of vapour pressure at or near the location of the 84 measurement stations.

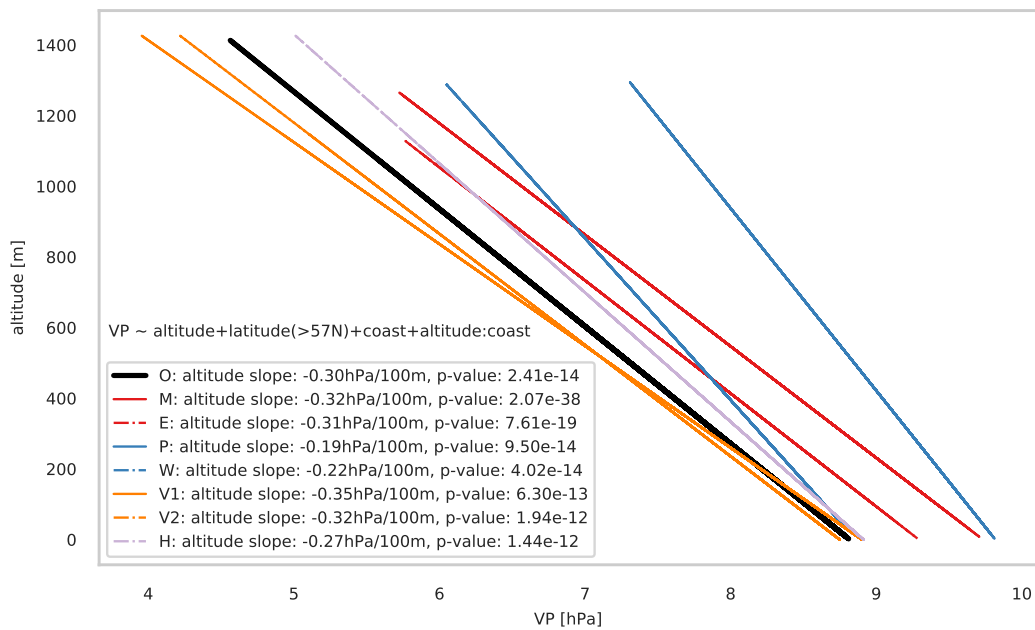

**Figure S4.** Vapour pressure as a function of altitude alone (excluding the interaction term between distance to the coast and altitude), when based on a linear regression model including latitude (above 57 °N), altitude, distance to the coast, with interaction allowed between the latter predictors. The regression is based on annual mean values of vapour pressure at or near the location of the 84 measurement stations.

**Observation stations**

**Table S1.** Stations observing humidity which are included in the analysis. For each station the name, latitude (lat, [°N]), longitude (lon, [°E]), altitude [m], and distance to the ocean [km] of the station are denoted, as well as the first and last month and year of the time-series included in the study.

| Name                    | Lat  | Lon  | Altitude [m] | $\Delta$ ocean [km] | From          | To            |
|-------------------------|------|------|--------------|---------------------|---------------|---------------|
| MANDALII                | 58.0 | 7.4  | 138          | 2.3                 | January 1982  | December 1999 |
| LANDVIK                 | 58.3 | 8.5  | 10           | 4.6                 | January 1982  | December 1999 |
| NELAUG                  | 58.7 | 8.6  | 142          | 18.1                | January 1982  | December 1999 |
| OBRESTADFYR             | 58.7 | 5.6  | 24           | 0.5                 | January 1982  | December 1999 |
| BYGLANDSFJORD-SOLBAKKEN | 58.7 | 7.8  | 212          | 49.7                | January 1982  | December 1999 |
| SOLA                    | 58.9 | 5.6  | 7            | 1.3                 | January 1982  | December 1999 |
| SIRDAL-TJOERHOM         | 58.9 | 6.8  | 500          | 21.7                | January 1982  | December 1999 |
| STAVANGER-VAALAND       | 59.0 | 5.7  | 72           | 1.0                 | January 1982  | January 1988  |
| PRESTEBAKKE             | 59.0 | 11.5 | 157          | 16.6                | January 1982  | December 1999 |
| TVEITSUND               | 59.0 | 8.5  | 252          | 45.3                | January 1982  | December 1999 |
| RENNESOEY-GALTA         | 59.1 | 5.6  | 19           | 11.3                | January 1982  | December 1999 |
| SKUDENESII              | 59.1 | 5.2  | 2            | 1.2                 | November 1992 | December 1999 |
| MELSOM                  | 59.2 | 10.3 | 26           | 1.2                 | January 1982  | August 1994   |
| SARPSBORG               | 59.3 | 11.1 | 57           | 10.1                | December 1991 | December 1999 |
| RYGGE                   | 59.4 | 10.8 | 40           | 4.9                 | January 1982  | December 1999 |
| GVARV                   | 59.4 | 9.2  | 26           | 34.4                | January 1982  | July 1989     |
| AAS                     | 59.7 | 10.8 | 94           | 9.4                 | January 1982  | December 1999 |
| KONGSBERGIV             | 59.7 | 9.7  | 168          | 34.5                | January 1982  | December 1999 |
| DRAMMEN-MARIENLYST      | 59.7 | 10.2 | 3            | 18.0                | January 1982  | December 1999 |
| MOESSTRANDII            | 59.8 | 8.2  | 977          | 93.0                | January 1982  | December 1999 |
| MIDTLAEGER              | 59.8 | 7.0  | 1079         | 33.8                | January 1982  | December 1999 |
| ASKER                   | 59.9 | 10.4 | 163          | 3.2                 | January 1983  | December 1999 |
| DOENSKI                 | 59.9 | 10.5 | 59           | 2.3                 | January 1982  | December 1999 |
| LYNGDALINUMEDAL         | 59.9 | 9.5  | 288          | 27.1                | January 1982  | December 1999 |
| OSLO-BLINDERN           | 59.9 | 10.7 | 94           | 3.2                 | January 1982  | December 1999 |
| MAGNOR                  | 60.0 | 12.2 | 154          | 35.7                | January 1982  | December 1999 |
| HAKADAL-BLIKSUDHAGAN    | 60.1 | 10.9 | 174          | 21.9                | December 1982 | December 1999 |
| GARDERMOEN              | 60.2 | 11.1 | 202          | 22.6                | January 1982  | December 1999 |
| VINGER                  | 60.2 | 12.0 | 175          | 48.7                | January 1982  | December 1999 |
| FLESLAND                | 60.3 | 5.2  | 48           | 1.5                 | January 1982  | December 1999 |
| BERGEN-FLORIDA          | 60.4 | 5.3  | 12           | 0.96                | January 1982  | December 1999 |
| KVAMSKOGEN              | 60.4 | 5.9  | 408          | 8.1                 | January 1982  | December 1999 |
| GEILO-GEILOSTOELEN      | 60.5 | 8.2  | 810          | 58.1                | January 1982  | December 1999 |
| NESBYEN-SKOGLUND        | 60.6 | 9.1  | 167          | 60.7                | January 1982  | December 1999 |
| VOSS-BOE                | 60.6 | 6.5  | 125          | 18.2                | January 1982  | December 1999 |
| GOL-STAKE               | 60.7 | 8.9  | 542          | 65.3                | January 1982  | February 1991 |
| KISEPAHEDMARK           | 60.8 | 10.8 | 129          | 3.1                 | April 1987    | December 1999 |
| MODALENII               | 60.8 | 6.0  | 114          | 14.5                | January 1982  | December 1999 |
| AABJOERSBRAATEN         | 60.9 | 9.3  | 639          | 48.2                | January 1982  | December 1999 |

**Table S2.** Stations observing humidity which are included in the analysis. For each station the name, latitude (lat, [°N]), longitude (lon, [°E]), altitude [m], and distance to the ocean [km] of the station are denoted, as well as the first and last month and year of the time-series included in the study.

| Name                 | lat  | lon  | altitude [m] | $\Delta$ ocean [km] | start          | end           |
|----------------------|------|------|--------------|---------------------|----------------|---------------|
| FAGERNES             | 61.0 | 9.2  | 358          | 53.8                | July 1982      | December 1999 |
| LOEKENIVOLBU         | 61.1 | 9.1  | 521          | 68.8                | January 1982   | December 1999 |
| RENA-HAUGEDALEN      | 61.2 | 11.4 | 240          | 42.5                | January 1982   | December 1999 |
| EVENSTAD-OEVERENGET  | 61.4 | 11.1 | 255          | 49.8                | January 1982   | December 1999 |
| FJAERLAND-SKARESTAD  | 61.4 | 6.8  | 10           | 2.3                 | February 1982  | December 1999 |
| SKAABU-STORSLAAEN    | 61.5 | 9.4  | 890          | 71.1                | January 1982   | December 1999 |
| SOGNEFJELLHYTTA      | 61.6 | 8.0  | 1413         | 23.2                | January 1982   | December 1999 |
| VENABU               | 61.7 | 10.1 | 930          | 61.6                | January 1982   | December 1999 |
| BJOERKEHAUGIJOSTEDAL | 61.7 | 7.3  | 305          | 24.7                | January 1982   | December 1999 |
| SANDANE              | 61.8 | 6.2  | 51           | 1.9                 | January 1982   | December 1999 |
| DREVSJOE             | 61.9 | 12.0 | 672          | 7.7                 | January 1982   | December 1999 |
| KJOEREMSGRENDE       | 62.1 | 9.0  | 626          | 69.1                | January 1982   | December 1999 |
| FISKAABYGD           | 62.1 | 5.6  | 41           | 1.0                 | January 1982   | December 1999 |
| FOKSTUGU             | 62.1 | 9.3  | 973          | 72.9                | January 1982   | December 1999 |
| TAFJORD              | 62.2 | 7.4  | 11           | 0.1                 | January 1982   | December 1999 |
| LESJASKOG            | 62.2 | 8.4  | 621          | 48.9                | January 1982   | December 1999 |
| VIGRA                | 62.6 | 6.1  | 22           | 7.8                 | January 1982   | December 1999 |
| ROEROS               | 62.6 | 11.4 | 628          | 31.6                | January 1982   | December 1999 |
| SUNNDALSOERAI        | 62.7 | 8.6  | 10           | 1.5                 | February 1983  | December 1999 |
| TINGVOLL-HANEM       | 62.8 | 8.3  | 69           | 2.2                 | January 1982   | December 1999 |
| ORKDAL-OEYUM         | 63.2 | 9.8  | 22           | 12.1                | January 1982   | December 1999 |
| SELBU-STUBBE         | 63.2 | 11.1 | 242          | 28.0                | January 1982   | December 1999 |
| VAERNES              | 63.5 | 10.9 | 12           | 1.8                 | January 1982   | December 1999 |
| OERLANDIII           | 63.7 | 9.6  | 10           | 2.4                 | January 1982   | December 1999 |
| NAMDALSEID           | 64.3 | 11.2 | 86           | 6.9                 | August 1982    | November 1999 |
| LEKA                 | 65.1 | 11.7 | 47           | 8.7                 | January 1982   | December 1999 |
| SVENNINGDAL          | 65.4 | 13.4 | 121          | 24.3                | January 1982   | June 1987     |
| GLOMFJORD            | 66.8 | 14.0 | 39           | 1.4                 | January 1982   | December 1999 |
| BODOEVI              | 67.3 | 14.4 | 11           | 1.0                 | January 1982   | December 1999 |
| FINNOEYIHAMAROEY     | 68.0 | 15.6 | 53           | 5.0                 | January 1982   | December 1999 |
| NARVIKIII            | 68.5 | 17.5 | 17           | 1.0                 | January 1982   | December 1999 |
| BOEIVESTERAALENII    | 68.6 | 14.5 | 12           | 3.0                 | January 1982   | December 1999 |
| SORTLAND-KLEIVA      | 68.6 | 15.3 | 14           | 2.5                 | January 1982   | August 1991   |
| TENNEVOLL            | 68.7 | 17.8 | 22           | 1.8                 | January 1982   | December 1999 |
| SIHCCAJAVRI          | 68.8 | 23.5 | 382          | 122.3               | April 1982     | December 1999 |
| BORKENES             | 68.8 | 16.2 | 36           | 3.1                 | September 1983 | December 1999 |
| DIVIDALEN            | 68.8 | 19.7 | 228          | 48.9                | January 1982   | December 1999 |
| BARDUFOSS            | 69.1 | 18.5 | 76           | 15.0                | January 1982   | December 1999 |
| ANDOEYA              | 69.3 | 16.1 | 10           | 1.9                 | June 1982      | December 1999 |
| CUOVDDATMOHKKI       | 69.4 | 24.4 | 286          | 77.5                | January 1982   | December 1999 |
| KARASJOK             | 69.5 | 25.5 | 155          | 67.5                | January 1982   | December 1999 |
| SUOLOVUOPMI          | 69.6 | 23.5 | 377          | 41.2                | March 1982     | December 1999 |
| TROMSOE              | 69.7 | 18.9 | 100          | 3.3                 | January 1982   | December 1999 |
| TROMSOE-LANGNES      | 69.7 | 18.9 | 8            | 2.0                 | January 1982   | December 1999 |
| KIRKENESLUFTHAVN     | 69.7 | 29.9 | 89           | 0.9                 | January 1982   | December 1999 |

**Table S3.** The stations observing SW ↓ and LW ↓ included in the analysis are listed. For each station the name, latitude (lat, [°N]), longitude (lon, [°E]), altitude [m], and distance to the ocean [km] of the station are denoted, as well as the first and last month and year of the time-series included in the study. The stations with a +-sign are agricultural stations drifted by Bioforsk. The LW observation stations are marked with an asterisk. The percentage of discarded data within the time-series and the total number of days used in the validation are given, for LW data this is given in parenthesis. % flagged data includes missing data within the time-series.

| Name        | lat. | lon. | altitude | $\Delta$ ocean | start          | end           | % flagged | # Days      |
|-------------|------|------|----------|----------------|----------------|---------------|-----------|-------------|
| +Saerheim   | 58.8 | 5.7  | 90       | 27.6           | April 1987     | December 1999 | 27        | 3365        |
| +Aas        | 59.7 | 10.8 | 94       | 9.4            | August 1991    | December 1999 | 13        | 2655        |
| *Bergen-GFI | 60.4 | 5.3  | 40       | 3.5            | January 1982   | December 1999 | 3(*4)     | 6357(*6460) |
| +Apelsvoll  | 60.7 | 10.9 | 262      | 88.2           | March 1987     | December 1999 | 25        | 3494        |
| +Kise       | 60.8 | 10.8 | 129      | 96.1           | April 1987     | December 1999 | 4         | 4455        |
| Loeken      | 61.1 | 9.1  | 527      | 73.4           | January 1991   | December 1999 | 15        | 2778        |
| Gjengedal   | 61.7 | 6.0  | 355      | 24.6           | July 1989      | June 1996     | 18        | 2062        |
| +*Trondheim | 63.4 | 10.5 | 127      | 4.1            | September 1996 | December 1999 | (23)      | (675)       |
| +Bodoe      | 67.3 | 14.5 | 26       | 6.5            | April 1987     | December 1999 | 15        | 4002        |
| Maze        | 69.5 | 23.7 | 277      | 59.0           | August 1982    | January 1990  | 13        | 2408        |
| +Tromsoe    | 69.7 | 18.9 | 12       | 3.5            | June 1987      | December 1999 | 29        | 3468        |
